# Supplementary material for: Deep learning analysis of clinical course of primary nephrotic syndrome: Japan Nephrotic Syndrome Cohort Study (JNSCS)
Source: PubMed Central journal article supplement (PMC9668942; doi:10.1007/s10157-022-02256-3), 2022-08-12
Supplement: 10157_2022_2256_MOESM1_ESM.pdf [file 10157_2022_2256_MOESM1_ESM.pdf]

Supplementary Table 1. The number of patients without missing values over 5 measurement points up to 2 years.

| Time point                       | 1 month | 2 months | 6 months | 1 year | 2 years |
|----------------------------------|---------|----------|----------|--------|---------|
| Untraceable                      | 4       | 15       | 32       | 48     | 65      |
| Any missing value                | 76      | 61       | 45       | 55     | 51      |
| Traceable with no missing values | 294     | 271      | 253      | 227    | 205     |

Blood and urine were collected and tested for the following 5 items: serum creatinine, serum albumin, qualitative hematuria, qualitative proteinuria, and urinary protein per creatinine ratio.

Supplementary Table S2. Reasons for untraceability of participants.

| Time points          | 1 month      | 2 months      | 6 months      | 1 year        | 2 years       |
|----------------------|--------------|---------------|---------------|---------------|---------------|
| Untraceable          | 4            | 15            | 32            | 48            | 65            |
| Transfer of hospital | 2<br>(50.0%) | 10<br>(66.7%) | 20<br>(62.5%) | 33<br>(68.8%) | 41<br>(63.1%) |
| Self-interruption    | 1            | 2             | 2             | 4             | 4             |
| Cure                 | 0            | 0             | 0             | 1             | 3             |
| Ddeath               | 0            | 1             | 8             | 9             | 15            |
| Unknown              | 1            | 2             | 2             | 1             | 2             |

Values, numbers of patients (% of all untraceable patients).

Supplementary Table S3. Mean and SD values for Figure 4.

| Cluster | Time Course | Creatinine (mg/dL) |        | Albumin (g/dL) |        | Proteinuria (qualitative) |        | Proteinuria (g/gram creatinine) |        | Hematuria (qualitative) |        |
|---------|-------------|--------------------|--------|----------------|--------|---------------------------|--------|---------------------------------|--------|-------------------------|--------|
|         |             | Mean               | SD     | Mean           | SD     | Mean                      | SD     | Mean                            | SD     | Mean                    | SD     |
| C1      | 1           | 0.8109             | 0.2288 | 3.3348         | 0.5516 | 0.4588                    | 0.8339 | 0.1579                          | 0.2576 | 0.1529                  | 0.4474 |
|         | 2           | 0.7916             | 0.1765 | 3.9726         | 0.5088 | 0.3529                    | 0.6980 | 0.1097                          | 0.1654 | 0.1647                  | 0.6106 |
|         | 3           | 0.8114             | 0.1848 | 4.1833         | 0.5789 | 0.3647                    | 0.8924 | 0.1838                          | 0.7219 | 0.2353                  | 0.6970 |
|         | 4           | 0.8018             | 0.2009 | 4.1901         | 0.4358 | 0.2824                    | 0.6618 | 0.0709                          | 0.2433 | 0.3059                  | 0.7360 |
|         | 5           | 0.8121             | 0.2038 | 4.2112         | 0.6309 | 0.5529                    | 1.1325 | 0.5304                          | 2.1263 | 0.3412                  | 0.7904 |
| C2      | 1           | 1.1877             | 0.9067 | 2.6860         | 0.5661 | 3.0577                    | 1.1505 | 2.4607                          | 1.6947 | 1.4038                  | 1.4710 |
|         | 2           | 1.0435             | 0.4079 | 3.1462         | 0.5112 | 2.8462                    | 1.2150 | 1.5400                          | 1.0861 | 1.4038                  | 1.4710 |
|         | 3           | 1.0598             | 0.4164 | 3.7510         | 0.5006 | 1.8654                    | 1.1772 | 0.6794                          | 0.7417 | 1.4231                  | 1.3636 |
|         | 4           | 1.0292             | 0.3988 | 3.8810         | 0.4579 | 1.2692                    | 1.2877 | 0.4976                          | 0.8655 | 1.1154                  | 1.3251 |
|         | 5           | 1.0450             | 0.4131 | 4.4100         | 2.6529 | 0.6538                    | 0.9585 | 0.3463                          | 0.7212 | 0.8077                  | 1.0926 |
| C3      | 1           | 1.0381             | 0.3818 | 2.3747         | 0.6837 | 3.8750                    | 1.0232 | 6.7292                          | 6.9538 | 1.5313                  | 1.4358 |
|         | 2           | 0.9534             | 0.3152 | 2.6438         | 0.6554 | 3.4688                    | 1.0893 | 4.0365                          | 2.7696 | 1.0938                  | 1.0112 |
|         | 3           | 0.9628             | 0.2897 | 3.3853         | 0.5892 | 2.8438                    | 1.2018 | 2.0322                          | 1.6066 | 1.4375                  | 1.3679 |
|         | 4           | 0.9588             | 0.2900 | 3.6950         | 0.5180 | 1.8125                    | 1.2854 | 1.0835                          | 1.2044 | 1.3750                  | 1.2930 |
|         | 5           | 0.9875             | 0.3723 | 3.9584         | 0.5066 | 1.3125                    | 1.4238 | 0.6215                          | 0.9350 | 0.8750                  | 1.2437 |
| C4      | 1           | 1.3281             | 1.1599 | 2.3000         | 0.7276 | 3.9167                    | 0.7592 | 6.5092                          | 3.2736 | 2.0833                  | 1.3411 |
|         | 2           | 1.2592             | 1.0107 | 2.5361         | 0.6520 | 3.7500                    | 0.7949 | 6.3970                          | 3.7161 | 1.5833                  | 1.5343 |
|         | 3           | 1.2067             | 0.5326 | 2.8611         | 0.7350 | 3.4722                    | 0.8971 | 4.7472                          | 3.7078 | 1.6389                  | 1.4748 |
|         | 4           | 1.3806             | 0.6776 | 3.0428         | 0.7963 | 3.5556                    | 1.2121 | 5.2062                          | 5.0596 | 1.8056                  | 1.3707 |
|         | 5           | 2.0317             | 2.3425 | 3.1583         | 0.8703 | 3.3333                    | 1.3123 | 4.5786                          | 3.3294 | 1.6111                  | 1.3597 |

Time point 1 to 5 represent 1, 2, 3 months, 1 and 2 years, respectively.

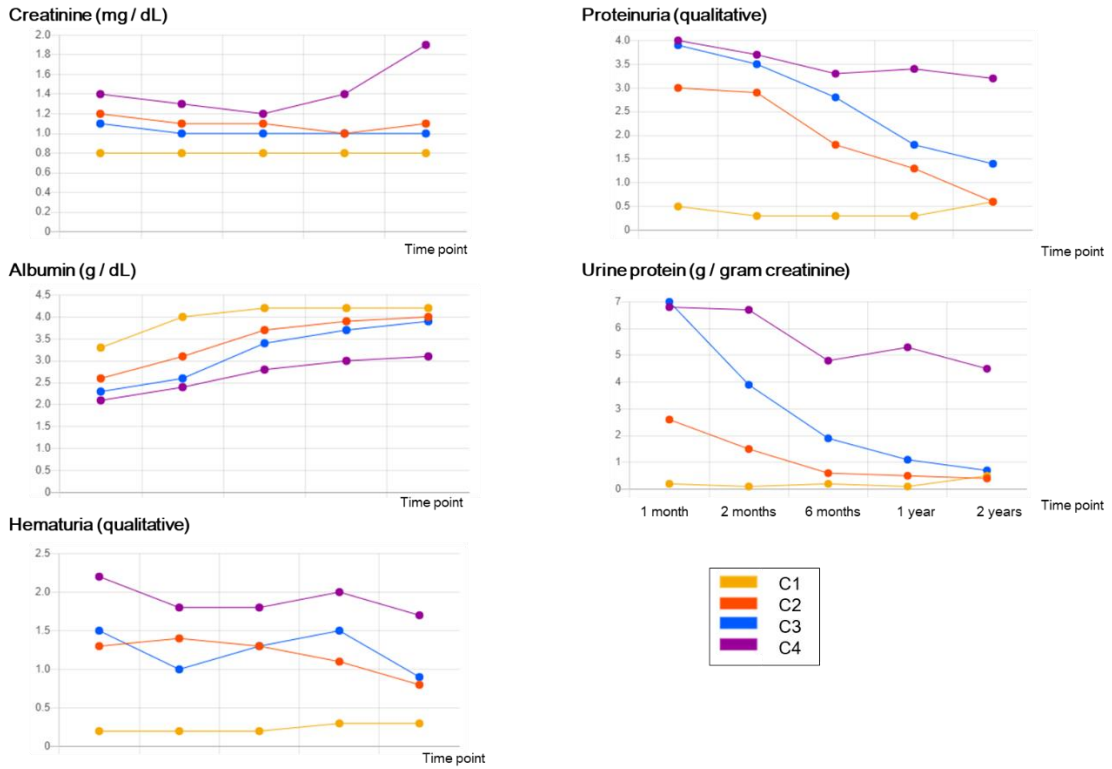

Supplementary Figure 1. Mean values of each clinical item for each cluster for 186 cases are shown in chronological order.
